# Supplementary material for: Assessing the Evidence for e-Resources for Mental Health Self-Management: A Systematic Literature Review
Source: PubMed Central journal article supplement (PMC4607376; doi:10.2196/mental.3708), 2014-12-08
Supplement: mental_v1i1e3_app1.pdf [file mental_v1i1e3_app1.pdf]

Appendix 1. Sample list of excluded studies with reasons.

| Reference                                                                                                                                                                                                                                                                                                | Reason for exclusion                                    |
|----------------------------------------------------------------------------------------------------------------------------------------------------------------------------------------------------------------------------------------------------------------------------------------------------------|---------------------------------------------------------|
| Anttila M, Koivunen M, Välimäki M (2008). Information technology-based standardized patient education in psychiatric inpatient care. <i>J Adv Nurs</i> , 64(2): 147-56.                                                                                                                                  | Aim of resource is simply educational & used by staff   |
| Ebert D, Tarnowski T, Gollwitzer M, Sieland B, Berking M (2013). A Transdiagnostic Internet-Based Maintenance Treatment Enhances the Stability of Outcome after Inpatient Cognitive Behavioral Therapy: A Randomized Controlled Trial. <i>Psychother Psychosom</i> , 82:246–256.                         | Aim of resource is online counselling or online therapy |
| Garnefski N, Kraaij V, Schroevers M (2011). Effects of a cognitive behavioral self-help program on depressed mood for people with acquired chronic physical impairments: A pilot randomized controlled trial. <i>Patient Education and Counseling</i> , 85: 304–307.                                     | Static self-management information                      |
| Hirai M, Clum GA (2006). A Meta-Analytic Study of Self-Help Interventions for Anxiety Problems. <i>Behavior Therapy</i> , 37: 99–111.                                                                                                                                                                    | Aim of resource is online counselling or online therapy |
| Robertson L, Smith M, Castle D, Tannenbaum D (2006). Using the Internet to enhance the treatment of depression. <i>Australian Psychiatry</i> , 14(4): 413-417.                                                                                                                                           | Aim of resource is online counselling or online therapy |
| Simon D, Kriston L, von Wolff A, Buchholz A, Vietor C, Hecke T, Loh A, Zenker M, Weiss M, Harter M (2012). Effectiveness of a web-based, individually tailored decision aid for depression or acute low back pain: A randomized controlled trial. <i>Patient Education and Counseling</i> , 87: 360–368. | Aim of resource is simply educational                   |
