# Supplementary material for: Assessing the Evidence for e-Resources for Mental Health Self-Management: A Systematic Literature Review
Source: PubMed Central journal article supplement (PMC4607376; doi:10.2196/mental.3708), 2014-12-08
Supplement: mental_v1i1e3_app2.pdf [file mental_v1i1e3_app2.pdf]

**Table 1.** Included studies and e-resources characteristics (full version).

| References;<br>Country; E-<br>resource Name                  | Study Design                                   | Primary Outcome<br>Measures                                                                                                                                                  | Study Sample                               | Delivery Type                                | Methodological<br>Quality Rating <sup>a</sup> | Brief E-resource Description                                                                                                                                                                                                                                                                                                           |
|--------------------------------------------------------------|------------------------------------------------|------------------------------------------------------------------------------------------------------------------------------------------------------------------------------|--------------------------------------------|----------------------------------------------|-----------------------------------------------|----------------------------------------------------------------------------------------------------------------------------------------------------------------------------------------------------------------------------------------------------------------------------------------------------------------------------------------|
| Depp 2010 [18],<br>USA,<br><i>PRISM</i>                      | RCT <sup>b</sup> (study design<br>description) | Bipolar disorder                                                                                                                                                             | Insufficient<br>information.               | PDA <sup>c</sup> + clinic-<br>based sessions | 4 (out of 13)                                 | PRISM aims to identify mood states and illness<br>triggers, and to prompt users to engage in self-<br>management strategies. Users respond to a<br>mood chart with pre-selected self-management<br>strategies appearing when exacerbation in<br>symptoms is signalled.                                                                 |
| Goodyear-Smith<br>2013 [13],<br>New Zealand,<br><i>eCHAT</i> | General e-resource<br>description              | Unhealthy behaviours<br>(risky substance use,<br>gambling, being subject<br>to abuse, physical<br>inactivity) and negative<br>mood states<br>(depression, anxiety,<br>anger) | Adult primary<br>care<br>populations.      | Website                                      | 6 (out of 6)                                  | eCHAT aims to improve health and well-being<br>through systematic screening and intervention<br>from modifiable lifestyle and mental health<br>issues. A number of possible interventions can<br>be accessed using a stepped care model.                                                                                               |
| Kauer 2012 [11],<br>Australia,<br><i>Mobilitytype</i>        | RCT                                            | Depression                                                                                                                                                                   | Adolescent<br>primary care<br>populations. | Mobile app                                   | 11 (out of 13)                                | Mobilitytype is a first-step intervention<br>programme. It aims to improve emotional self-<br>awareness by self-monitoring functioning areas<br>such as current activities, location, companions,<br>mood, recent stressful events, responses to<br>stressful events, alcohol use, cannabis use,<br>sleep quality, exercise, and diet. |

|                                                 |                                                                                  |                                                                 |                                                                                          |                                                            |                |                                                                                                                                                                                                                                                                                                                                                                 |
|-------------------------------------------------|----------------------------------------------------------------------------------|-----------------------------------------------------------------|------------------------------------------------------------------------------------------|------------------------------------------------------------|----------------|-----------------------------------------------------------------------------------------------------------------------------------------------------------------------------------------------------------------------------------------------------------------------------------------------------------------------------------------------------------------|
| Kizakevich 2012 [12], USA, <i>PHIT for Duty</i> | General e-resource description                                                   | Stress, depression, anger, anxiety, alcohol use, sleep quality. | U.S. military exposed to psychological trauma and possibly showing symptoms of distress. | Mobile app                                                 | 4 (out of 6)   | PHIT for Duty aims to support prevention of psychological health problems through mobile personal health assessment and self-help intervention. It integrates a suite of health assessments with an intelligent advisor that recommends, tailors, and presents self-help interventions.                                                                         |
| Kordy 2013 [14], Germany, <i>SUMMIT</i>         | RCT (study design description)                                                   | Depression                                                      | Adult mental health service users.                                                       | Website; website + online chat with clinician in real time | 7 (out of 13)  | SUMMIT aims to prolong symptom-free phases and to shorten symptom-loaden phases by promoting self-management by continuous monitoring and supportive feedback. Patients may use peer-support forum.                                                                                                                                                             |
| Simon 2011 [15], USA, <i>MyRecoveryPlan</i>     | Pilot study                                                                      | Bipolar disorder                                                | Insufficient information.                                                                | Website; website + peer specialist online coaching         | 10 (out of 13) | MyRecoveryPlan aims to support users in creating and using personal recovery plans. It includes educational, recovery plan, self-monitoring, social networking and consumer activation modules. Users may create plans, use customizable tools for self-monitoring, peer-support forums, and develop calendars with clinical appointments and discussion items. |
| Treanor 2012 [16], UK, <i>Buddy</i>             | Mixed-methods (unclear at which stage in development/evaluation of intervention) | Mental health problems                                          | Insufficient information.                                                                | Website + text messages                                    | 1 (out of 13)  | Buddy aims to help users understand the relationship between the things they do in their daily lives and their mental state using self-reflection. Users record their daily activities and rate their mood. They also received text reminders about their clinic appointments.                                                                                  |

---

|                                                          |                |                  |                                          |         |                |                                                                                                                                                                                                                                                                          |
|----------------------------------------------------------|----------------|------------------|------------------------------------------|---------|----------------|--------------------------------------------------------------------------------------------------------------------------------------------------------------------------------------------------------------------------------------------------------------------------|
| Todd 2012 [17],<br>UK,<br><i>Living with<br/>Bipolar</i> | RCT (protocol) | Bipolar disorder | Adult mental<br>health service<br>users. | Website | 13 (out of 13) | The Living with Bipolar emphasis is on symptom management by giving interpersonal and practical support to allow patients to live successfully alongside their condition. Patients may use worksheets, life charts, diaries, mood checking tools, online peer forum etc. |
|----------------------------------------------------------|----------------|------------------|------------------------------------------|---------|----------------|--------------------------------------------------------------------------------------------------------------------------------------------------------------------------------------------------------------------------------------------------------------------------|

---

<sup>a</sup> scoring range for papers that include evaluation studies: 0-13; scoring range for papers that do not include evaluation studies: 0-6.

<sup>b</sup> RCT: randomised control trial

<sup>c</sup> PDA: personal digital assistant
